# Supplementary material for: Comparative metabolic state of microflora on the surface of the anode electrode in a microbial fuel cell operated at different pH conditions
Source: PubMed Central journal article supplement (PMC5174012; doi:10.1186/s13568-016-0299-4), 2016-12-20

# **Additional File -1**

## **Comparative metabolic state of microflora on the surface of the anode electrode in a microbial fuel cell operated at different pH conditions**

### ***AMB Express***

Daisuke Sasaki<sup>1</sup>, Kengo Sasaki<sup>1</sup>, Yota Tsuge<sup>2</sup>, and Akihiko Kondo<sup>1,3,4</sup>

<sup>1</sup> Graduate School of Science, Technology and Innovation, Kobe University, 1-1 Rokkodaicho, Nada-ku, Kobe, Hyogo 657-8501, Japan

<sup>2</sup> Institute for Frontier Science Initiative, Kanazawa University, Kakuma-machi, Kanazawa, Ishikawa 920-1192, Japan

<sup>3</sup> Graduate School of Engineering, Kobe University, 1-1 Rokkodai-cho, Nada-ku, Kobe, Hyogo 657-8501, Japan

<sup>4</sup> RIKEN Center for Sustainable Resource Science, 1-7-22 Suehiro-cho, Tsurumi-ku, Yokohama, Kanagawa 230-0045, Japan

Corresponding author: Prof. Akihiko Kondo (E-mail: akondo@kobe-u.ac.jp)

**Table S1.**

Phylogenetic affiliations and number of bacterial clones obtained from retained and suspended fractions in MFC operated for 30 days at pH 4.0.

| OTU <sup>a</sup> | No. of clones <sup>b</sup> |           | Phylogenetic group                         | The closest isolated strain<br>(accession no., similarity)  | The closest environmental clone<br>(accession no., similarity) | Isolated source of<br>environmental clones |
|------------------|----------------------------|-----------|--------------------------------------------|-------------------------------------------------------------|----------------------------------------------------------------|--------------------------------------------|
|                  | Retained                   | Suspended |                                            |                                                             |                                                                |                                            |
| 1                | 1                          |           | <i>Proteobacteria; Deltaproteobacteria</i> | <i>Desulfovibrio desulfuricans</i><br>(NR_104990, 99.6%)    | uncultured <i>Desulfovibrio</i> sp.<br>(FJ393090, 99.7%)       | MFC using glucose and<br>lactate           |
| 2                | 3                          |           | <i>Proteobacteria; Gammaproteobacteria</i> | <i>Frateuria</i> sp. EC-K130<br>(AB264175, 100%)            | uncultured bacterium<br>(EF201736, 99.4%)                      | lake sediment core                         |
| 3                |                            | 6         | <i>Proteobacteria; Gammaproteobacteria</i> | <i>Enterobacter asburiae</i><br>(JF772078, 99.7%)           | uncultured <i>Citrobacter</i> sp.<br>(GQ416219, 99.9%)         | biological degreasing<br>systems           |
| 4                | 6                          |           | <i>Proteobacteria; Betaproteobacteria</i>  | <i>Pandoraea sputorum</i><br>(JQ839144, 100%)               | <i>Pandoraea</i> sp. G5084<br>(AF247693, 100%)                 | blood cultures                             |
| 5                | 6                          |           | <i>Proteobacteria; Betaproteobacteria</i>  | <i>Burkholderia pseudomultivorans</i><br>(NR_117661, 98.6%) | <i>Burkholderia</i> sp. MAC25<br>(HM587748, 98.6%)             | forest soil                                |
| 6                | 18                         | 20        | <i>Bacteroidetes; Bacteroidia</i>          | <i>Bacteroides stercoris</i><br>(NR_112943, 86.8%)          | uncultured bacterium<br>(EF515298, 99.4%)                      | upflow MFC anode                           |
| 7                |                            | 10        | <i>Bacteroidetes; Bacteroidia</i>          | <i>Prevotella paludivivens</i><br>(AB081578, 97.5%)         | uncultured bacterium<br>(JN245858, 99.9%)                      | wastewater treatment plant                 |
| 8                | 3                          |           | <i>Firmicutes; Negativicutes</i>           | <i>Pectinatus frisingensis</i><br>(NR_117702, 99.9%)        | <i>Pectinatus</i> sp. H1<br>(FJ668028, 99.9%)                  | UASB hydrogen-producing<br>bioreactor      |
| 9                |                            | 1         | <i>Firmicutes; Negativicutes</i>           | <i>Selenomonas bovis</i><br>(JN613164, 90.7%)               | uncultured bacterium<br>(EU828397, 92.0%)                      | Hydrogen-producing<br>bioreactor           |
| 10               | 2                          |           | <i>Firmicutes; Clostridia</i>              | <i>Clostridium swelofunium</i><br>(NR_126179, 98.4%)        | uncultured bacterium<br>(HQ266807, 98.8%)                      | rice field soil                            |
| <b>Sum</b>       | <b>39</b>                  | <b>38</b> |                                            |                                                             |                                                                |                                            |

<sup>a</sup> Sequences with more than 97.0% homology were considered as being the same as the operational taxonomic unit (OTU).

<sup>b</sup> Suspended: the suspended fraction obtained from fermentation broth, Retained: the retained fraction obtained from anode graphite felts.

## Figure S1.

Comparison of intracellular metabolite concentrations related to central metabolism in microbial cells growing on the MFC anode (pH 7.0: black bars, pH 5.5: gray bars, and pH 4.0: white bars). The metabolite concentrations ( $\mu\text{mol g-cell}^{-1}$ ) were measured after 30 days' operation. Error bars indicate  $\pm$  standard deviation.

Abbreviations: 1,3 BPG, 1,3-bisphosphoglycerate; 2PG, 2-phosphoglycerate; 3PG, 3-phosphoglycerate; 6PGA, 6-phosphogluconate; 6PGL, 6-phosphogluconolactone; AMP, adenosine-monophosphate; DHAP, dihydroxyacetone phosphate; E4P, erythrose-4-phosphate; F6P, fructose-6-phosphate; FBP, fructose-1,6-bisphosphate; G6P, glucose-6-phosphate; GAP, glyceraldehyde-3-phosphate; PEP, phosphoenolpyruvate; PYR, pyruvate; Pi, phosphoric acid; PPi, pyrophosphoric acid; R5P, ribose-5-phosphate; Ru5P, ribulose-5-phosphate; S7P, sedoheptulose-7-phosphate; X5P, xylulose-5-phosphate.

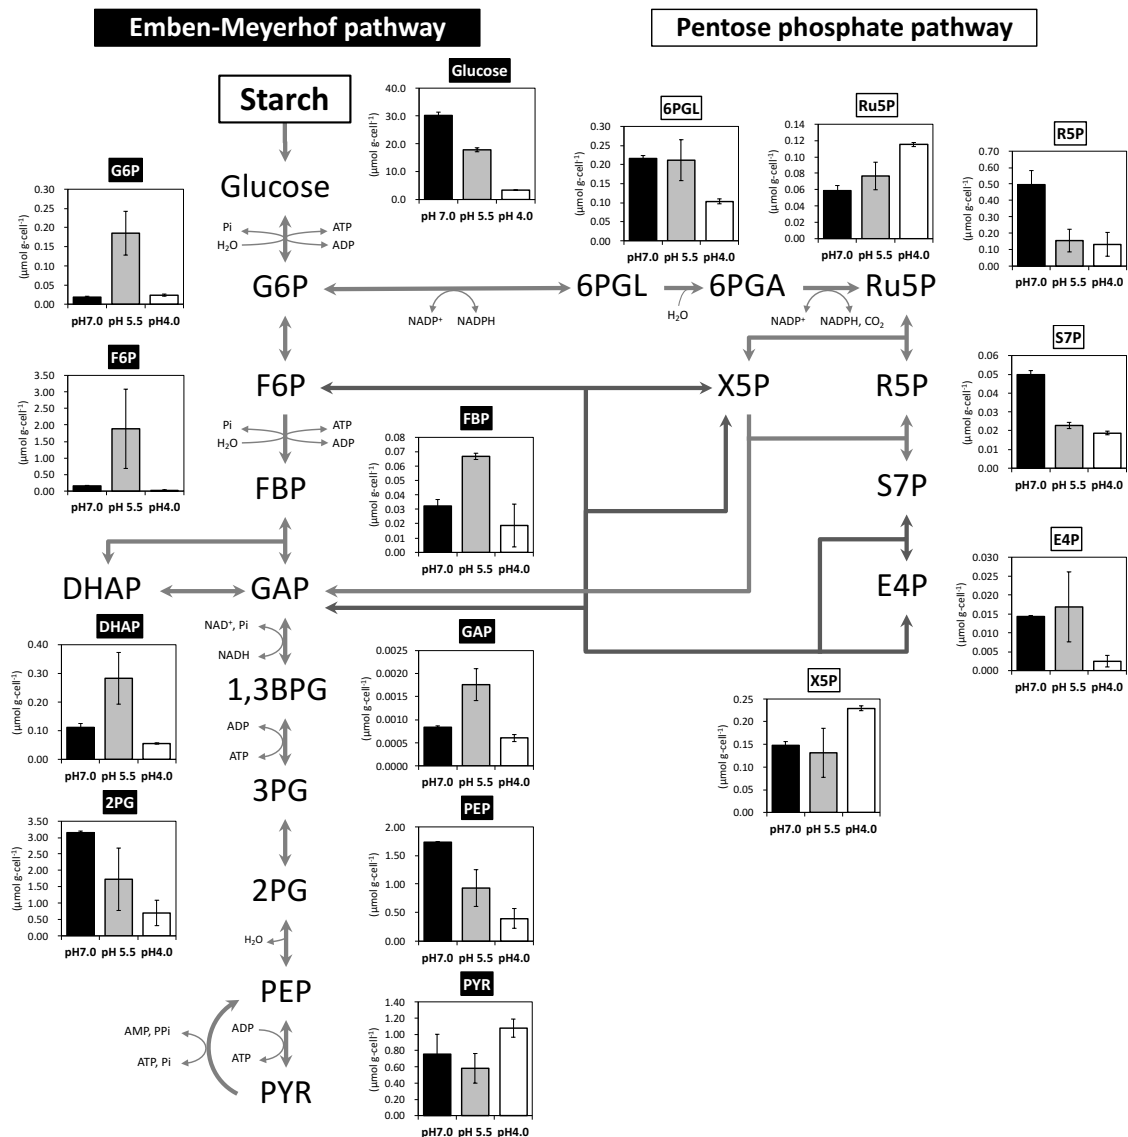

Supplement: 13568_2016_299_MOESM1_ESM.pdf [file 13568_2016_299_MOESM1_ESM.pdf]
